# Supplementary material for: Economical synthesis of composites of FeNi alloy nanoparticles evenly dispersed in two-dimensional reduced graphene oxide as thin and effective electromagnetic wave absorbers
Source: Royal Society of Chemistry journal article supplement (doi:10.1039/c7ra13737k), 2018-01-01
Supplement: c7ra13737k1.pdf [file c7ra13737k1.pdf]

# Economical Synthesis of FeNi alloy nanoparticles evenly dispersed two-dimensional reduced graphene oxide composites as thin and effective electromagnetic wave absorbers

Juan Li<sup>a</sup>, Dong Zhang<sup>b</sup>, Hui Qi<sup>c</sup>, Guangming Wang<sup>a</sup>, Jimin Tang<sup>a</sup>, Ge Tian<sup>a</sup>, Anhua Liu<sup>a,d</sup>, Huijuan Yue<sup>\*a,d</sup>, Yang Yu<sup>e</sup> and Shouhua Feng<sup>a</sup>

<sup>a</sup>State Key Laboratory of Inorganic Synthesis and Preparative Chemistry, College of Chemistry, Jilin University, Changchun 130012, China.

<sup>b</sup>Key Laboratory of Physics and Technology for Advanced Batteries (Ministry of Education), College of Physics, Jilin University, Changchun 130012, China.

<sup>c</sup>The Second Hospital of Jilin University, Changchun 130041, P.R. China.

<sup>d</sup>Key Laboratory of High Performance Ceramic Fibers of Ministry of Education, College of Materials, Xiamen University, Xiamen 361005, China.

<sup>e</sup>State Key Laboratory of Rare Earth Resource Utilization, Changchun Institute of Applied Chemistry, Chinese Academy of Science, Changchun, China

Corresponding author: [huijuan@jlu.edu.cn](mailto:huijuan@jlu.edu.cn) (Huijuan Yue)

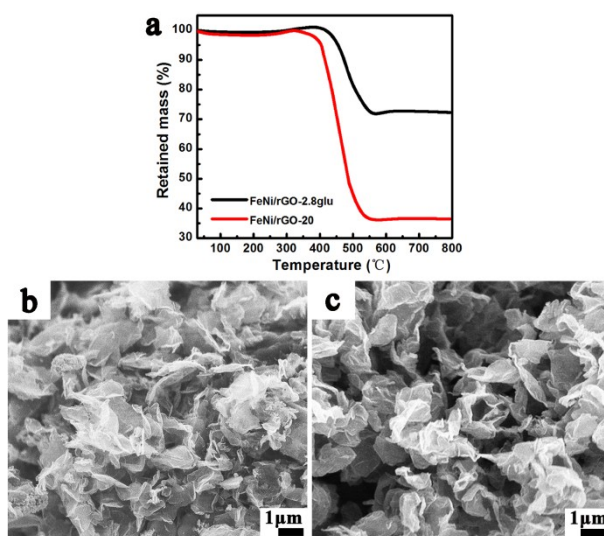

**Fig. S1** TG curves (a) of FeNi/rGO-2.8glu and FeNi/rGO-20 composites; SEM images of FeNi/rGO-2.8glu (b) and FeNi/rGO-20 (c) composites.

The FeNi/rGO-2.8glu and FeNi/rGO-20 composites are synthesized via the same experimental procedures except for the different dosages of glucose (2.8 mmol for FeNi/rGO-2.8glu, 7.6 mmol for FeNi/rGO-20). From Fig. S1a, it can be obviously noted that FeNi/rGO-2.8glu and FeNi/rGO-20 composites display remaining weight of 72.34% and 36.46%, respectively. The mass percentage of carbon-based materials can be accordingly calculated as 44.80 % and 72.18%, respectively. The amount of carbon increases correspondingly as more glucose is added in the reaction. This indicates that the carbon formed by glucose is present in the product. Additionally, Fig. S1(b-c) both show purely two-dimensional structure for FeNi/rGO-2.8glu and FeNi/rGO-20 composites with no other morphologies. Again, it can manifest that glucose is carbonized into the amorphous carbon depositing on the surface of graphene.

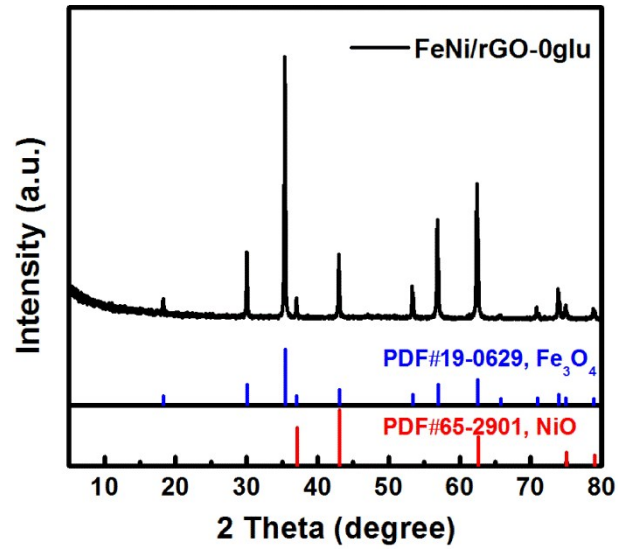

Fig. S2 XRD pattern of FeNi/rGO-0glu composite without glucose.

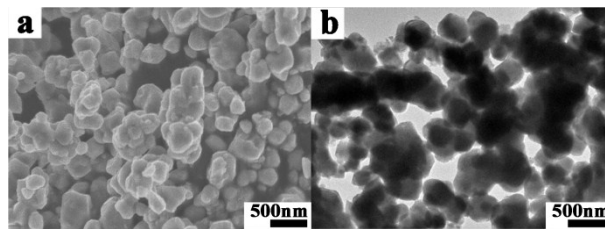

Fig. S3 SEM (a) and TEM (b) images of FeNi/rGO-0glu composite without glucose.

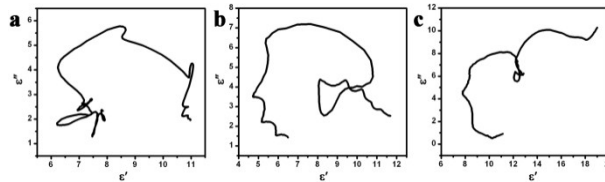

Fig. S4 Typical Cole-Cole semicircles ( $\epsilon'$  versus  $\epsilon''$ ) for FeNi/rGO-20 (a), FeNi/rGO-60 (b) and FeNi/rGO-100 (c).
